# Supplementary material for: Evolution and Genetic Architecture of Chromatin Accessibility and Function in Yeast
Source: PubMed Central journal article supplement (PMC4081003; doi:10.1371/journal.pgen.1004427), 2014-07-03

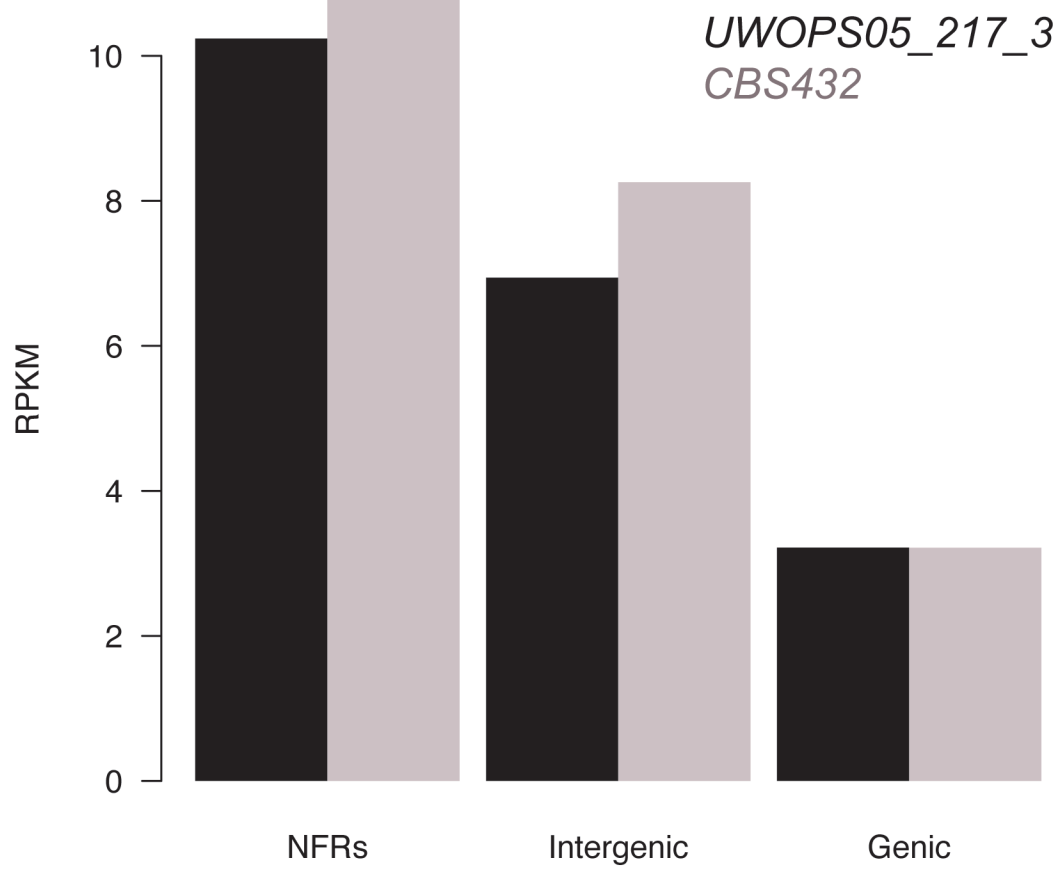

Supplement: pgen.1004427.s001.pdf [file pgen.1004427.s001.pdf]
